# Supplementary material for: The audio-visual integration effect on music emotion: Behavioral and physiological evidence
Source: PLoS One. 2019 May 30;14(5):e0217040. doi: 10.1371/journal.pone.0217040 (PMC6542535; doi:10.1371/journal.pone.0217040)
Supplement: S1 Dataset — (XLSX) [file pone.0217040.s001.xlsx]

## Sheet: 行为
编号	A1B1C1	A1B3C1	A1B2C1	A2B1C1	A2B3C1	A2B2C1	A1B1C2	A1B3C2	A1B2C2	A2B1C2	A2B3C2	A2B2C2
1	7.5	8.5	6.5	2	1	2.5	2.5	1.5	3.5	8	9	7.5
2	8	8.5	6	3.5	3	5	2	1	4	8.5	8	7.5
3	6.5	6.5	6	1	3	2	1	1.5	3.5	8.5	6.5	7.5
4	8	8.5	4	1	4.5	3	2.5	1.5	5.5	9	5.5	7.5
5	4.5	4.5	3	1	1	1	1	1	1.5	6	7	5
6	6	5	4.5	5	4	3	3	4.5	4	8	7.5	7
7	6	5	4.5	3.5	3.5	2.5	1.5	5	5	6.5	6.5	6.5
8	5	7	3	1	3	3	2	1	5	9	5	7
9	8.5	7	7	1	1	1	1	1	3	9	6.5	8.5
10	7.5	7	7	3.5	3.5	3	1	1	1.5	6	6.5	4.5
11	6	6.5	6.5	1	1	2	1	3	3	7.5	7.5	6
12	8.5	8.5	6	2	1.5	2	1	1.5	3.5	8.5	8	7.5
13	8	8	7.5	3.5	5.5	4	1.5	1	2	7	4.5	6
14	7	8	8	1.5	2.5	2.5	1	1	4	8.5	7.5	7
15	7.5	7.5	6	1	2.5	4	1	1	1.5	7.5	6	6
16	7	7	7.5	2	2	2	1.5	1.5	1.5	6.5	6	7.5
17	8	6	4	3	3.5	4	1	2.5	6	7	6.5	6
18	7.5	7	7.5	1	3	2	1.5	1.5	3	8	8	7.5
19	7	6	6.5	5	5	4.5	1	1	1	3	1	2.5
20	8.5	7	5	1	2	3	1.5	2.5	4.5	8.5	8.5	7.5
21	8.5	8	4	1	2	5	1.5	1.5	6	8.5	7.5	5
22	7	5	5.5	1.5	3.5	1.5	1	1	5.5	7	4	6.5
23	4	5	2	1.5	1	1.5	1.5	1	2.5	5.5	6	7.5
24	8	8	3	2.5	2.5	2	2	2	7	7.5	7.5	8
25	7.5	7	6.5	2.5	2	2.5	2	1	4.5	8.5	7	7
26	9	8.5	5.5	3	4	6	1	1	2.5	8	1.5	5.5
27	8	8	7	1.5	1.5	1.5	2	2	2.5	9	9	8.5
28	7.5	8	5.5	3	4.5	4.5	2	1	5.5	7	5.5	4.5
29	7	6.5	5.5	2	5	2	2	3	5	8	3.5	6.5
30	8.5	7	4	1	1	1.5	1.5	2	3	8	8	8.5
31	7	7.5	5.5	1	1.5	1.5	2	1	4.5	8.5	8	8
32	6.5	5.5	5.5	2	3	2.5	6.5	5	5.5	5	6.5	5

## Sheet: heart rate
编号	A1B1	A1B2	A1B3	A2B1	A2B2	A2B3
1	71.76	72.62	73.96	65.87	71.93	70.1
2	81.67	79.2	83.47	79.66	80.97	86.14
3	82.77	76.26	79.94	74.82	79.26	76.71
4	89.29	90.15	84.93	86.41	86.04	90.56
5	94.4	89.95	87.82	89.5	87.81	89.51
6	84.83	86.55	85.62	87.02	85.72	85.93
7	90.68	86.39	92.54	88.68	90.43	88.67
8	80.35	82.87	82.75	81.95	83.93	87.03
9	82.77	76.26	79.94	74.82	79.26	76.71
10	78.1	81.53	83.79	79.12	78.99	77.73
11	79.55	84.32	85.88	81.37	83.73	81.76
12	46.5	48.81	49.31	49.64	49.58	49.02
13	60.09	55.36	58.02	56.08	58.15	55.35
14	63.35	60.89	60.29	60.91	60.1	60.55
15	92.48	92.67	95.39	93.84	98.15	94.8
16	75.8	74.32	75.05	74.24	74.42	73.52
17	72.37	71.46	73.16	71.91	72.21	73.77
18	79.11	83.16	79.11	80.35	81.3	79.19
19	70.7	65.47	66.05	62.44	65.05	65.52
20	81.42	80.43	81.34	79.01	81.42	79.87
21	85.93	87.03	84.76	83.41	85.17	84
22	81.71	82.63	83.47	80.28	80.14	82.33
23	74.84	76.15	78.59	74.78	77.08	75.08
24	91.65	86.88	91.6	86.94	88.77	87.43
25	69.44	70.65	73.73	70.63	71.36	70.89
26	73.13	73.14	72.96	71.84	72.36	73.1
27	99.78	101.58	99.11	99.31	101.16	101.1
28	97.17	96.39	97.65	95.36	97.86	96.74
29	65.74	64.65	66.27	68.04	63.46	74.76
30	80.36	82.86	82.75	81.9	83.95	87.03
31	82.78	76.27	79.95	74.81	79.25	76.73
32	80.34	82.88	82.74	81.94	83.93	87.04

## Sheet: temperature
编号	A1B1	A1B2	A1B3	A2B1	A2B2	A2B3
1	34.08	34.06	34.05	34.06	34.06	34.06
2	34.21	34.08	34.23	34.22	34.22	34.24
3	34.09	34.2	34.24	34.36	34.39	34.49
4	35.95	36.09	36.18	36.23	36.29	36.33
5	33.83	33.9	33.97	34.04	34.08	34.25
6	32.46	32.55	32.67	32.78	32.91	32.75
7	33.6	33.74	33.82	33.81	33.83	34.02
8	33.31	32.94	32.59	33	33.01	32.61
9	33.58	33.82	33.96	34.02	34.12	34.24
10	33.86	33.91	33.95	33.99	34.14	34.19
11	33	33.12	33.22	33.28	33.32	33.35
12	32.84	33.01	33.02	33.01	32.92	33.15
13	32.02	32.05	32.12	32.13	32.15	32.21
14	32.54	32.85	32.96	33.05	33.04	33.09
15	29.42	30.03	30.26	30.42	30.45	28.76
16	30.6	29.88	30.64	30.31	30.61	30.76
17	30	29.79	29.93	30.31	30.07	30.23
18	30.13	30.35	30.36	30.1	29.87	29.11
19	34.18	34.33	34.37	34.34	34.32	34.29
20	32.57	31.97	32.26	32.55	32.7	32.68
21	33.15	33.05	32.82	32.64	32.52	32.32
22	30.33	30.27	30.51	30.24	30.26	30.13
23	29.02	28.76	28.65	28.49	28.39	28.25
24	32.39	32.43	32.52	32.53	32.56	32.47
25	34.76	34.96	35	34.9	34.71	34.81
26	32.64	32.68	32.48	32.23	32.71	33.07
27	32.95	32.82	32.99	33.03	33.05	33
28	32.88	33.09	33.2	33.24	33.14	33.14
29	31.48	31.51	31.5	31.36	31.63	31.72
30	29.86	29.57	28.78	27.76	27.91	27.77
31	31.15	31.06	31.11	30.82	30.84	30.76
32	33.66	33.64	33.69	33.79	33.78	33.79

## Sheet: EMG
编号	A1B1	A1B2	A1B3	A2B1	A2B2	A2B3
1	0.06048	0.06296	0.05664	0.05836	0.06137	0.05936
2	0.02477	0.02388	0.02496	0.02516	0.02458	0.02684
3	0.02634	0.0234	0.02407	0.02502	0.02336	0.02464
4	0.02898	0.02819	0.02698	0.02803	0.02806	0.02691
5	0.02935	0.02948	0.02959	0.02925	0.02892	0.02955
6	0.0193	0.01929	0.01901	0.01815	0.01862	0.01846
7	0.02224	0.02269	0.02085	0.02005	0.01965	0.01941
8	0.0399	0.03804	0.03595	0.03618	0.03514	0.03518
9	0.05486	0.05367	0.05161	0.0532	0.05533	0.05454
10	0.04518	0.04834	0.04637	0.0457	0.04579	0.04631
11	0.06419	0.05965	0.05957	0.05804	0.06171	0.06052
12	0.06196	0.06035	0.06207	0.06026	0.0665	0.0638
13	0.04286	0.04433	0.04238	0.04342	0.04418	0.0412
14	0.04289	0.04471	0.04339	0.04435	0.0441	0.04416
15	0.05754	0.0533	0.05367	0.05367	0.05728	0.05714
16	0.01144	0.01463	0.01506	0.01097	0.01133	0.01589
17	0.05268	0.05392	0.05183	0.05128	0.0555	0.05677
18	0.01704	0.01649	0.01621	0.017	0.01724	0.01745
19	0.03134	0.03149	0.03047	0.03077	0.03101	0.03117
20	0.0425	0.04521	0.04804	0.04702	0.04674	0.04784
21	0.02923	0.02751	0.02741	0.02615	0.02832	0.02751
22	0.05256	0.05095	0.05195	0.0498	0.05179	0.05149
23	0.02251	0.02182	0.02243	0.02304	0.02118	0.02168
24	0.01767	0.01791	0.01753	0.01749	0.01879	0.01746
25	0.02717	0.02499	0.02629	0.02579	0.0283	0.02693
26	0.05424	0.04566	0.04585	0.05103	0.04449	0.04455
27	0.03621	0.03702	0.03639	0.03604	0.03769	0.03725
28	0.03232	0.03248	0.03075	0.03086	0.03086	0.03098
29	0.06484	0.0646	0.06334	0.0622	0.06102	0.0623
30	0.04478	0.04467	0.04094	0.03986	0.03953	0.04038
31	0.05899	0.05883	0.05786	0.05772	0.05954	0.05566
32	0.04795	0.04872	0.0476	0.04588	0.04742	0.04797

## Sheet: alpha
编号	A1B1	A1B2	A1B3	A2B1	A2B2	A2B3
1	-46.37	-46.65	-47.74	-46.93	-46.25	-46.37
2	-46.46	-47.33	-45.86	-46.5	-45.39	-46.83
3	-52.91	-53.49	-53.05	-53.26	-52.16	-53.29
4	-52.63	-52.67	-52.78	-52.54	-52.24	-53.18
5	-51.68	-51.03	-51.21	-52	-51.12	-50.84
6	-54.61	-54.73	-54.47	-54.79	-53.52	-53.84
7	-49.22	-48.89	-49.25	-49.07	-47.92	-49.42
8	-49.42	-50.77	-50.38	-50.23	-49.72	-48.06
9	-49.64	-47.71	-48.92	-49.53	-48.49	-48.91
10	-44.97	-45.53	-45.31	-44.55	-45.66	-43.78
11	-41.94	-44.02	-42.7	-43.43	-43.95	-42.45
12	-48.3	-47.41	-47.4	-47.4	-45.97	-47.96
13	-45.11	-46.71	-46.43	-45.72	-45.63	-46.2
14	-63.06	-61.35	-62.6	-61.71	-61.7	-62.15
15	-46.21	-45.92	-47.51	-46.9	-46.52	-44.71
16	-53.85	-54.42	-54.86	-54.44	-54.04	-52.88
17	-49.99	-49.16	-49.15	-49.61	-48.78	-48.94
18	-47.31	-47.82	-47.37	-47.33	-45.67	-46.71
19	-54.17	-57.43	-59.12	-58.48	-57.68	-58
20	-55.11	-54.11	-54.84	-56	-54.5	-55.3
21	-49.26	-50.5	-50.11	-49.98	-49.15	-50.24
22	-48.53	-48.11	-48.7	-47.47	-46.59	-47.86
23	-48.8	-48.54	-49.88	-49.25	-48.53	-49.43
24	-45.73	-45.15	-46.25	-45.08	-46.12	-46.31
25	-50.65	-52.46	-51.66	-52.12	-51.16	-51.54
26	-54.83	-54.58	-53.57	-55.85	-55.39	-55.54
27	-56.08	-55	-54.49	-56.04	-54.61	-56.64
28	-49.01	-49.63	-48.93	-48.56	-49.38	-49.49
29	-47.3	-47.83	-47.37	-47.34	-45.66	-46.71
30	-54.18	-57.42	-59.14	-58.48	-57.68	-58.2
31	-55.11	-54.11	-54.84	-56	-54.5	-55.3
32	-49.99	-49.17	-49.16	-49.61	-48.79	-48.94

## Sheet: beta
编号	A1B1	A1B2	A1B3	A2B1	A2B2	A2B3
1	-46.27	-44.97	-45.64	-45.75	-46.48	-45.35
2	-45.14	-45.45	-47.07	-46.06	-45.9	-45.41
3	-51.53	-52.06	-51.56	-51.99	-51.61	-51.22
4	-51.46	-51.45	-52.01	-51.93	-50.67	-51.76
5	-51.78	-53.29	-51.97	-52.64	-51.67	-51.41
6	-53.01	-54.21	-53.95	-53.18	-53.08	-54.29
7	-55.04	-54.28	-55.19	-55.75	-55.47	-55.96
8	-49.44	-49.7	-48.42	-48.82	-48.57	-49.33
9	-46.15	-46.28	-47.14	-46.62	-46.45	-45.36
10	-46.23	-47.19	-47.67	-47.44	-47.65	-46.78
11	-44.46	-44.82	-44.91	-45.18	-45.9	-44.46
12	-43.29	-44.44	-45.35	-43.94	-43.07	-43.44
13	-45.95	-46.24	-46.92	-45.16	-47.13	-45.46
14	-45.57	-44.58	-44.08	-45.4	-45.4	-45
15	-43.32	-45.2	-44.35	-44.16	-44.32	-43.62
16	-59.2	-59.02	-59.19	-59.25	-58.46	-59.17
17	-44.12	-44.68	-44.45	-45.81	-44.85	-44.4
18	-55.72	-55.99	-57.14	-55.73	-55.66	-55.24
19	-50.4	-50.66	-49.97	-50.32	-49.39	-50.44
20	-46.54	-46.96	-45.71	-46.05	-46.09	-46.3
21	-48.16	-48.45	-49.46	-47.43	-48.65	-47.75
22	-46.11	-46.41	-45.53	-46.56	-46.35	-47.44
23	-53.95	-53.89	-53.21	-53.42	-53.77	-53.47
24	-56.72	-56.03	-56.9	-56.27	-55.38	-56.09
25	-51.42	-51.42	-51.43	-51.74	-51.29	-51.61
26	-48.64	-48.93	-50.08	-49.46	-48.78	-48.26
27	-49.79	-48.84	-48.56	-48.95	-48.85	-48.69
28	-49.7	-49.25	-49.47	-50.28	-49.71	-49.76
29	-42.27	-44.22	-44.5	-44.8	-44.12	-43.65
30	-59.33	-60.12	-59.73	-60.57	-59.64	-61.15
31	-45.82	-46.87	-48.27	-46.11	-47.45	-47.83
32	-49.94	-50.49	-50.99	-49.78	-50.12	-50.07

## Sheet: theta
编号	A1B1	A1B2	A1B3	A2B1	A2B2	A2B3
1	-48.89	-47.67	-48.27	-47.23	-47.14	-47.69
2	-52.77	-50.65	-51.54	-51.54	-50.89	-52.01
3	-49.51	-50.89	-51.15	-51.07	-51.27	-50.22
4	-49.34	-47.68	-48.51	-48.02	-49.44	-48.97
5	-49.65	-49.51	-48.97	-51.48	-49.85	-48.68
6	-51.06	-50.93	-52.65	-53.49	-53.94	-54.55
7	-52.62	-51.39	-52.64	-53.88	-54.2	-53.76
8	-46.54	-44.96	-44.41	-44.19	-45.76	-45.44
9	-36.65	-40.26	-41.32	-40.91	-42.05	-39.5
10	-51.25	-49.23	-50.75	-49.59	-52.03	-51.56
11	-45.69	-46.26	-46.9	-47.18	-45.84	-45.94
12	-48.18	-48.18	-47.08	-47.99	-48.55	-49.63
13	-61.55	-61.63	-61.15	-64.46	-64.41	-64
14	-42.7	-43.6	-43.82	-44.99	-43.68	-43.5
15	-52.16	-50.8	-51.03	-50.18	-49.91	-49.21
16	-48.53	-47.45	-47.92	-47.63	-47.85	-47.54
17	-51.92	-53.37	-53.34	-53.32	-52.63	-52.16
18	-45.24	-43.58	-45.26	-43.75	-43.63	-46.23
19	-44.22	-44.81	-45.24	-44.64	-45.3	-45.89
20	-52.51	-51.25	-48.11	-51.91	-50.51	-50.71
21	-60.08	-60.46	-60.85	-60.09	-60.51	-61.01
22	-54.88	-52.68	-54.79	-54.57	-54.37	-53.94
23	-42.37	-45.36	-45.51	-46.99	-42.64	-44.99
24	-42.24	-40.53	-42.63	-41.34	-41.95	-42.83
25	-47.1	-45.57	-47.23	-46.48	-46.68	-46.57
26	-46.11	-45.75	-46.28	-45.71	-45.2	-45.75
27	-59.49	-61.62	-60.77	-59.37	-60.68	-61.7
28	-43.82	-42.24	-45.28	-42.51	-45.07	-45.98
29	-48.69	-49.22	-46.47	-49.18	-48.34	-49.4
30	-44.76	-44.08	-46.7	-48.19	-47.24	-45.14
31	-49.55	-50.51	-49.63	-49.42	-49.67	-49.58
32	-48.03	-46.33	-47.2	-46.2	-48.84	-48.67

## Sheet: gamma
编号	A1B1	A1B2	A1B3	A2B1	A2B2	A2B3
1	-44.57	-42.75	-44.23	-43.68	-44.7	-46.67
2	-48.34	-47.73	-46.92	-49.4	-49.45	-49.36
3	-48.38	-46.79	-46.4	-48.41	-46.82	-48.04
4	-47.42	-48.83	-47.88	-49.3	-46.47	-46.14
5	-41.44	-44.11	-45.54	-44.54	-47.93	-45.15
6	-49.6	-47.5	-50.98	-51.1	-51.5	-52.04
7	-37.85	-39.67	-39.46	-38.53	-38.37	-38.67
8	-37.7	-35.43	-36.13	-35.68	-35.71	-34.9
9	-35.13	-38.25	-38.65	-38.54	-38.86	-38.99
10	-41.98	-39.61	-40.9	-42.1	-43.06	-43.25
11	-37.22	-37.94	-38.05	-39.19	-37.57	-37.86
12	-38.29	-35.68	-38.62	-39.67	-36.85	-38.25
13	-57.68	-57.5	-58.64	-58.54	-58.98	-59.23
14	-37.05	-39.29	-40.09	-41.2	-40.34	-38.46
15	-44.77	-45.18	-45.21	-44.59	-45.36	-44.14
16	-45.3	-45.79	-44.28	-42.95	-46.55	-44.68
17	-42.79	-42.81	-42.85	-43.28	-43.66	-44.29
18	-31.19	-31	-30.88	-31.92	-29.58	-32.54
19	-37.99	-38.32	-39.26	-39.47	-41.17	-39.5
20	-48.28	-47.07	-45.78	-46.85	-46.89	-46.73
21	-51.66	-54.36	-56.3	-55.81	-54.06	-54.76
22	-49.72	-48.16	-48.66	-49.62	-48.11	-48.47
23	-40.42	-40.26	-40.58	-39.31	-40.35	-38.16
24	-36.44	-36.3	-39.82	-36.99	-38.29	-38.28
25	-39.64	-39.52	-40.9	-40.12	-39.87	-40.66
26	-36.51	-36.7	-36.63	-36.61	-36.36	-37.13
27	-50.34	-50.21	-49.22	-48.71	-49.27	-49.1
28	-38.98	-37.85	-40.43	-37.75	-38.75	-39.3
29	-38.43	-38.06	-35.28	-38.02	-37.65	-37.33
30	-38.11	-38.05	-39.07	-39.63	-39.7	-36.64
31	-43.49	-44.03	-43.43	-44.84	-45.74	-45.97
32	-40.57	-40.2	-39.82	-39.94	-41.38	-43.33
