# Supplementary material for: The audio-visual integration effect on music emotion: Behavioral and physiological evidence
Source: PLoS One. 2019 May 30;14(5):e0217040. doi: 10.1371/journal.pone.0217040 (PMC6542535; doi:10.1371/journal.pone.0217040)
Supplement: S2 Dataset — (XLSX) [file pone.0217040.s002.xlsx]

## Sheet: 行为
编号	A1B1C1	A2B1C1	A1B2C1	A2B2C1	A1B1C2	A2B1C2	A1B2C2	A2B2C2	A1B1C3	A2B1C3	A1B2C3	A2B2C3
1	7	8	8	8	7	7	8	8	5	6	5	5
2	6	7	5	6	7	7	7	7	8	9	7	9
3	9	8	9	8	9	8	9	5	9	7	9	7
4	7	4	6	9	5	9	7	7	8	7	9	7
5	8	9	5	5	9	9	8	5	8	9	5	7
6	7	5	5	7	9	9	7	7	7	7	7	7
7	7	9	3	5	8	9	7	9	7	9	8	9
8	7	8	6	8	8	7	9	6	9	8	6	7
9	7	9	3	3	9	7	5	9	8	7	6	2
10	9	8	9	7	8	6	9	9	8	7	8	9
11	9	9	7	9	8	9	8	8	8	9	6	7
12	9	9	7	9	9	9	7	8	9	9	9	9
13	7	7	6	8	7	5	6	5	7	5	5	7
14	9	8	7	8	9	8	7	7	9	9	6	6
15	9	8	8	7	9	8	8	8	8	9	7	6
16	7	7	4	4	9	9	6	6	8	8	7	6
17	6	7	6	7	7	6	5	8	6	5	2	8
18	7	6	8	7	6	4	6	6	5	5	6	4
19	9	7	9	6	7	7	8	7	5	7	7	8
20	9	7	9	7	9	7	9	7	7	7	7	9
21	7	6	7	7	7	8	6	7	8	8	6	7
22	8	5	3	9	9	9	7	9	9	9	8	7
23	6	5	4	5	7	5	5	7	5	4	5	6
24	9	9	8	8	9	9	8	7	9	8	3	6
25	8	8	9	8	7	9	5	9	7	9	5	7
26	7	8	5	8	8	9	7	9	9	8	7	7
27	6	7	8	6	8	8	6	9	7	9	7	7
28	6	5	4	5	7	5	5	7	5	4	5	6
29	9	9	9	7	9	9	7	8	8	9	4	5
30	9	7	9	8	8	8	6	8	7	9	6	6
31	7	8	6	7	8	9	7	9	9	8	7	7
32	6	7	7	7	7	9	7	8	7	9	7	7

## Sheet: heart rate
编号	A1B1C1	A2B1C1	A1B2C1	A2B2C1	A1B1C2	A2B1C2	A1B2C2	A2B2C2	A1B1C3	A2B1C3	A1B2C3	A2B2C3
1	92.75	94.14	93.53	93.59	90.88	91.98	92.52	91.04	89.88	94.38	93.26	92.06
2	88.52	91.63	90.06	82.65	83.6	81.27	83.33	84.57	83.16	79.88	82.9	80.61
3	95.9	93.57	91.77	93.71	92.62	88.02	93.6	89.02	91.81	89.45	93.78	89.04
4	82.11	73.3	80.88	63.86	81.03	73.4	80.02	77.21	82.06	74.98	81.51	71.56
5	82.33	82.69	81.39	81.72	81.09	85.55	83.04	80.95	78.09	82.91	75.91	83.34
6	89.73	72.73	92.9	64.91	94.85	60.9	94.62	59.75	88.55	63.17	84.71	71.16
7	95.85	92.52	93.32	84.48	92.49	87.01	97.67	80.21	92.15	83.16	97.87	76.31
8	67.39	100.09	69.67	94.05	72.88	84.51	71.5	94.7	72.49	88.07	71.55	91.53
9	81.87	92.22	81.77	88.42	80.49	90.65	80.62	91.74	83.02	93.68	76.59	92.95
10	82.71	66.18	81.18	68.12	80.67	63.32	81.2	62.91	78.71	70.09	79.82	71.83
11	91.62	91.55	85.57	89.83	78.58	99.54	86.06	92.64	86.59	91.28	88.55	87.39
12	83.55	91.6	68.97	99.17	75	90.75	84.11	93.86	72.74	95.34	79.74	79.4
13	74.95	68.92	73.81	69.42	72.46	68.48	69.35	73.43	68.87	69.75	68.72	70.73
14	83.71	74.55	92.36	75.96	77.59	83.3	86.62	78.58	77.74	90.43	81.85	93.7
15	91.38	98.5	88.96	93.13	97.8	88.93	97.76	96.84	96.56	91.94	93.41	102.46
16	78.29	69.4	79.78	65.59	78.45	66.14	82.94	58.19	79.7	58.89	85.93	50.88
17	98.33	80.02	93.87	84.1	92.52	85.72	90.59	94.21	84.17	100.27	87.24	98.09
18	73.33	71.39	76.59	66.66	76.81	61.18	76	65.02	78.14	64.83	74.63	68.62
19	77.3	72.02	75.72	71.27	73.29	85.64	72.72	82.8	75.74	79.16	76.25	77.17
20	80.92	80.84	88.35	80.11	72.56	84.82	74.6	88.63	76.6	81.04	80.5	84.88
21	79.66	64.19	87.65	53.51	81.06	63.6	80.34	67.72	82.09	61.09	83.8	61.34
22	65.17	67.79	73.52	60.94	79.39	70.6	70.21	71.24	69.86	64.92	70.03	61.71
23	76.65	95.62	80.28	93.13	78.74	92.21	82.07	89.79	80.19	91.8	80.02	93.25
24	75.52	81.97	86.13	80.05	70.83	78.43	71.96	82.8	71.61	87.9	70.04	90.83
25	93.41	93.51	94.28	92.85	91.26	91.61	92.58	90.98	93.87	90.41	90.57	94.75
26	90.68	89.42	90.31	82.36	85.74	79.17	87.8	80.12	84.23	78.83	83.13	80.39
27	92.23	97.28	94.03	91.42	90.09	90.63	97.44	85.23	97.64	83.64	97.5	85.31
28	84.62	70.81	85.89	58.85	84.18	70.29	86.69	70.57	86.41	70.65	87.75	65.32
29	71.76	93.3	71.9	91.23	72.23	94.45	73.2	90.78	70.69	90.31	67.75	91.5
30	76.55	85.91	82.6	75.25	78.9	76.89	83.32	71.03	83.13	68.63	88.51	67.42
31	74.98	92.52	78.09	85.61	78.08	79.3	80	86.26	79.63	80.96	83.63	79.49
32	93.98	80.15	95.45	74.78	90.51	80.61	87.28	85.1	86.65	90.02	89.45	80.11

## Sheet: temperature
编号	A1B1C1	A2B1C1	A1B2C1	A2B2C1	A1B1C2	A2B1C2	A1B2C2	A2B2C2	A1B1C3	A2B1C3	A1B2C3	A2B2C3
1	34.82	34.77	34.81	34.74	29.72	31.55	33.23	33.96	34.41	34.26	34.49	34.66
2	36.46	36.48	36.55	36.44	35.22	36.46	36.7	36.65	36.88	36.69	36.07	36.85
3	32.87	32.61	32.65	32.63	32.44	32.51	32.63	32.65	32.77	32.72	32.65	32.93
4	34	34.07	34.14	34.14	32.77	33.05	33.24	33.43	33.62	33.74	33.85	33.92
5	33.16	32.92	33.22	33.1	27.56	25.07	32.68	32.62	33.14	33.3	33.37	32.78
6	34.8	34.85	34.73	34.72	33.79	34.12	34.36	34.53	34.61	34.74	34.67	34.88
7	33.43	33.07	32.84	33.09	31.43	32.68	33.06	33.04	33.07	33.66	33.43	33.45
8	33.74	33.74	33.76	33.77	33.21	33.3	33.41	33.48	33.47	33.53	33.56	33.63
9	34.75	34.83	34.81	34.83	34.08	34.29	34.44	34.56	34.62	34.65	34.71	34.75
10	34.72	34.76	34.8	34.82	33.86	34.16	34.18	34.26	34.39	34.53	34.62	34.66
11	32.56	32.62	32.59	32.6	32.02	32.32	32.47	32.54	32.71	32.73	32.74	32.71
12	33.3	33.31	33.34	33.39	32.56	32.75	32.92	33.03	33.13	33.2	33.3	33.25
13	35.25	35.27	35.26	35.26	34.46	34.86	35.09	35.17	35.23	35.25	35.27	35.27
14	33.86	33.87	33.72	33.51	33.14	33.27	33.39	33.42	33.76	33.68	33.77	33.82
15	32.31	31.96	31.97	31.88	31.97	29.5	29.37	29.73	29.34	29.24	28.93	28.62
16	35.22	35.47	35.63	35.68	35.68	35.63	35.61	35.55	35.57	35.54	35.54	35.54
17	33.74	34.08	34.19	34.11	34.1	34.23	34.13	34.03	33.95	33.97	33.78	34.03
18	31.95	32.06	32.12	32.2	32.21	32.22	32.26	32.3	32.33	32.13	32.34	32.39
19	32.87	33.33	33.46	33.9	33.52	33.59	33.51	33.57	33.61	33.55	33.52	33.46
20	31.12	30.67	30.61	30.76	30.52	30.59	30.87	30.84	30.73	30.69	30.84	30.88
21	32.81	32.95	32.94	32.8	32.63	32.76	32.76	32.73	32.89	32.61	32.53	32.54
22	33.98	34.08	34.08	34.06	33.97	34.02	34.15	33.94	34.07	33.99	34.17	34.26
23	33.09	33.66	33.9	34.08	34.08	34.22	34.43	34.39	34.54	34.41	34.43	34.49
24	34.06	34.22	34.34	34.46	34.54	34.61	34.63	34.68	34.74	34.77	34.78	34.79
25	32.93	33.18	33.32	33.5	33.63	33.72	33.85	33.87	33.96	34.01	34.03	34.04
26	33.23	33.46	33.62	33.75	33.9	33.94	34	34.07	34.19	34.21	34.22	34.31
27	33.09	33.45	33.6	33.8	33.4	33.92	33.74	34	33.94	33.91	34.2	34.26
28	31.82	31.93	31.94	31.87	32.24	32.83	32.23	32.09	32.18	32.13	32.08	31.83
29	32.69	32.95	32.81	32.47	31.96	31.43	31.28	31.06	30.05	25.83	25.56	25.4
30	34.46	34.86	35.09	35.17	35.23	35.25	35.27	35.27	35.25	35.27	35.26	35.26
31	31.8	32.13	32.23	32.48	32.55	32.74	32.68	33.07	33.13	33.03	32.95	33.17
32	34.8	34.77	34.73	34.84	31.62	29.7	33.43	33.76	34.54	34.15	34.48	34.65

## Sheet: EMG
编号	A1B1C1	A2B1C1	A1B2C1	A2B2C1	A1B1C2	A2B1C2	A1B2C2	A2B2C2	A1B1C3	A2B1C3	A1B2C3	A2B2C3
1	0.027033	0.027433	0.026742	0.025375	0.024806	0.025626	0.02634	0.02411	0.02582	0.025306	0.028445	0.026646
2	0.032014	0.031922	0.031484	0.028449	0.029662	0.029114	0.031163	0.030586	0.029354	0.02959	0.030063	0.029568
3	0.061911	0.059785	0.05854	0.059249	0.058545	0.056251	0.059138	0.056884	0.057272	0.053255	0.05691	0.051528
4	0.05471	0.053085	0.051118	0.051213	0.04953	0.050995	0.049593	0.049604	0.050794	0.05575	0.05479	0.050312
5	0.054938	0.052709	0.053578	0.055423	0.052259	0.051321	0.05234	0.052677	0.05254	0.047035	0.048271	0.050097
6	0.023718	0.020304	0.019215	0.018678	0.020917	0.019036	0.020269	0.019441	0.020952	0.018714	0.018446	0.018767
7	0.021381	0.020035	0.02023	0.022833	0.02221	0.02226	0.02201	0.022381	0.02163	0.022944	0.020963	0.021153
8	0.037369	0.03825	0.039988	0.0375	0.038307	0.037175	0.035999	0.036264	0.03564	0.035424	0.036752	0.03435
9	0.035745	0.032732	0.03143	0.03149	0.033057	0.031711	0.033063	0.033311	0.032599	0.031895	0.034114	0.030902
10	0.033929	0.032806	0.033094	0.032039	0.032371	0.033244	0.036029	0.034275	0.032538	0.033837	0.033467	0.032544
11	0.022273	0.021485	0.022246	0.021604	0.022562	0.021767	0.022453	0.022648	0.023521	0.023612	0.022564	0.023109
12	0.050132	0.046293	0.049121	0.048784	0.048834	0.047843	0.048107	0.046847	0.048761	0.047745	0.049177	0.048853
13	0.044502	0.043465	0.043313	0.043064	0.04361	0.042232	0.04401	0.040463	0.041539	0.040797	0.0396	0.040546
14	0.03025	0.028056	0.027583	0.027095	0.026329	0.027174	0.029054	0.029669	0.027653	0.027821	0.026084	0.026582
15	0.050608	0.047713	0.048237	0.047016	0.048224	0.046739	0.047421	0.047306	0.04871	0.046396	0.048045	0.048014
16	0.039725	0.036606	0.034729	0.035376	0.035244	0.033151	0.029766	0.028884	0.030029	0.029777	0.03046	0.031615
17	0.05605	0.059505	0.050293	0.070017	0.055759	0.057417	0.057659	0.057087	0.053333	0.057506	0.059803	0.058451
18	0.063503	0.063368	0.061588	0.05908	0.060342	0.061328	0.064983	0.063692	0.060842	0.062684	0.063883	0.063863
19	0.062682	0.059776	0.060426	0.058283	0.05803	0.05799	0.057232	0.055633	0.054982	0.056102	0.054272	0.053275
20	0.042321	0.018239	0.044815	0.011905	0.045212	0.011068	0.04656	0.01522	0.048844	0.007836	0.043284	0.009056
21	0.043568	0.002072	0.045828	-0.000508	0.043011	0.004209	0.041895	0.005385	0.041635	0.005905	0.04224	0.00532
22	0.058694	0.047406	0.040821	0.060119	0.04	0.09664	0.042319	0.080121	0.041198	0.069162	0.041902	0.065278
23	0.040793	0.020387	0.042824	0.019436	0.040332	0.018488	0.041704	0.017596	0.040371	0.020729	0.039571	0.022009
24	0.042372	0.004208	0.040058	0.010002	0.038657	0.008403	0.037077	0.008323	0.037138	0.009322	0.037554	0.009746
25	0.029279	0.019661	0.028238	0.018602	0.028598	0.020922	0.029927	0.019413	0.020801	0.027439	0.02151	0.02871
26	0.026612	0.028008	0.026445	0.031435	0.026559	0.025341	0.027192	0.027588	0.02716	0.02572	0.028557	0.028163
27	0.045714	0.033026	0.036361	0.043099	0.041961	0.045259	0.042273	0.042627	0.040824	0.039236	0.044892	0.035948
28	0.040104	0.043796	0.038214	0.046406	0.034262	0.043558	0.032886	0.048254	0.032915	0.047925	0.042447	0.040533
29	0.028882	0.052558	0.030741	0.049599	0.030143	0.050597	0.026725	0.056835	0.031333	0.050447	0.02866	0.05468
30	0.03397	0.03907	0.034025	0.040735	0.034079	0.045581	0.033993	0.043127	0.032804	0.041296	0.032978	0.039342
31	0.032267	0.022393	0.033191	0.019069	0.026173	0.027267	0.023475	0.029165	0.023672	0.027408	0.050184	0.002916
32	0.028144	0.035436	0.02961	0.03013	0.031128	0.027692	0.03064	0.03562	0.03059	0.02685	0.031184	0.026656

## Sheet: alpha
编号	A1B1C3	A2B1C3	A1B2C3	A2B2C3	A1B1C2	A2B1C2	A1B2C2	A2B2C2	A1B1C1	A2B1C1	A1B2C1	A2B2C1
1	-49.67	-49.96	-52.52	-51.84	-52.2	-53.49	-53.14	-52.82	-51.89	-52.45	-50.94	-52.68
2	-51.8	-52.85	-52.93	-53.23	-50.47	-52.55	-53.07	-51.38	-53.41	-52.09	-54.15	-54.02
3	-41.23	-44.98	-39.94	-43.1	-42.02	-45.22	-44.12	-39.55	-43.61	-41.69	-42.72	-45.25
4	-49.73	-49.33	-49.8	-48.89	-48.29	-50.17	-49.74	-48.37	-49.91	-49.29	-49	-49.36
5	-50.96	-49.5	-50.1	-50.72	-51.4	-50.86	-47.3	-50.9	-52.13	-49.46	-50.34	-49.81
6	-49.67	-52.23	-52.34	-52.59	-52.48	-52.13	-51.45	-51.41	-52.88	-51.09	-51.92	-51.94
7	-47.76	-48.24	-47.7	-48.99	-47.67	-49.11	-48.69	-47.48	-46.52	-46.34	-44.08	-47.25
8	-52.57	-52.64	-50.8	-51.7	-53.88	-53.03	-50.77	-49.93	-51.37	-51.31	-50.44	-52.83
9	-46.21	-47.73	-48.07	-47.93	-49.05	-48.04	-48.27	-47.77	-48.42	-45.93	-46.95	-48.47
10	-48.91	-47.17	-48.28	-47.86	-48.91	-47.06	-47.29	-46.5	-49.38	-48.26	-47.34	-48.41
11	-48	-51.13	-50.61	-49.85	-51.43	-49.56	-50.73	-48.55	-51.02	-50.55	-50.23	-51.51
12	-51.35	-51.24	-49.3	-52.8	-49.87	-51.09	-48.25	-48.99	-51.19	-52.58	-53.72	-51.52
13	-49.1	-47.1	-49.58	-48.51	-47.78	-43.64	-45.62	-44.23	-47.43	-46.31	-46.53	-47.11
14	-47.41	-47.63	-46.94	-47.74	-46.6	-48.26	-47.32	-48	-47.49	-46.59	-46.11	-46.54
15	-51.66	-48.73	-49.64	-49.09	-50.54	-48.85	-51.73	-46.58	-50.96	-50.42	-49.09	-49.41
16	-51.65	-52.92	-53.71	-54.84	-51.91	-51.93	-52.19	-52.94	-53.19	-52.5	-53.93	-51.88
17	-50.16	-49.75	-50.88	-49.28	-54.34	-52.12	-51.12	-49.78	-49.67	-50.11	-50.58	-51.09
18	-52.87	-53.69	-52.76	-54.21	-54.34	-53.76	-54.69	-54.94	-54.07	-54.95	-54.35	-53.2
19	-52.53	-42.02	-51.42	-46.97	-50.12	-46.48	-51.83	-43.08	-50.71	-45.16	-52.02	-47.05
20	-49.91	-56.24	-49	-57.51	-49.73	-58.96	-49.8	-58.31	-48.29	-57.17	-49.74	-55.48
21	-46.69	-43.25	-48.66	-44.14	-48.65	-42.99	-47.57	-44.7	-47.05	-45.3	-49.29	-42.37
22	-52.35	-40.26	-52.72	-40.19	-55.17	-37.21	-53.58	-38.36	-52.35	-41.03	-52.04	-40.48
23	-44.8	-49.61	-47.49	-41.11	-45.19	-46.28	-46.56	-45.37	-45.75	-46.75	-45.22	-47.71
24	-46.38	-54.89	-45.33	-56.79	-45.33	-56.88	-45.17	-57.19	-45.59	-54.86	-45.17	-56.72
25	-46.43	-46.51	-44.64	-48.99	-45.31	-48.93	-45.37	-43.97	-47.17	-46.01	-47.05	-46.28
26	-47.22	-52.04	-46.66	-53.7	-47.69	-50.76	-44.74	-54.74	-46.72	-48.89	-47.04	-55.23
27	-48.69	-41.19	-48.34	-40.82	-49.52	-40.32	-49.85	-37.17	-48.15	-41.42	-51.74	-39.9
28	-45.41	-43.04	-44	-45.41	-44.23	-44.93	-43.13	-47.44	-44.17	-46.21	-45.23	-44.29
29	-51.35	-38.63	-48.45	-44.41	-50.65	-41.01	-49.71	-42.63	-48.62	-43.73	-49.96	-41.74
30	-46.19	-46.4	-46.4	-46.44	-46.38	-46	-46.33	-45.65	-45.31	-48.04	-46.42	-46.12
31	-45.17	-49.24	-44.46	-44.14	-44.35	-47.12	-45.96	-45.97	-45.78	-46.72	-43.47	-49.46
32	-51.53	-49.74	-51.86	-50.27	-51.35	-50.85	-51.56	-50.81	-51.55	-48.9	-51.38	-50.51

## Sheet: beta
编号	A1B1C3	A2B1C3	A1B2C3	A2B2C3	A1B1C2	A2B1C2	A1B2C2	A2B2C2	A1B1C1	A2B1C1	A1B2C1	A2B2C1
1	-56.01	-56.07	-53.46	-53.83	-53.15	-55.66	-55.88	-57.3	-55.17	-56.71	-55.96	-56.77
2	-53.7	-53.04	-52.27	-51.95	-52.32	-54.01	-52.6	-52.22	-52.22	-52.8	-52.89	-52.91
3	-42.46	-44.07	-43.18	-45.39	-46.51	-44.34	-44.68	-44.79	-43.66	-43.98	-44.58	-44.17
4	-48.38	-46.52	-47.49	-47.91	-48.76	-47.94	-47.77	-48.35	-47.67	-47.69	-47.38	-49.01
5	-48.41	-48.49	-47.74	-48.98	-50.17	-50.03	-50.3	-48.46	-49.62	-47.71	-49.82	-49.33
6	-52.6	-53.59	-54.5	-55.37	-54.65	-54.85	-51.68	-56.04	-54.14	-53.94	-53.33	-55.31
7	-52.02	-49.8	-51.51	-51.32	-51.57	-51.1	-49.23	-51.06	-51.01	-52.31	-50.39	-50.29
8	-45.3	-43.3	-45.25	-44.52	-44.49	-45.62	-44.71	-45.13	-46.27	-45.26	-46.6	-43.69
9	-48.99	-48.09	-47.29	-46.94	-46.89	-48.66	-47.14	-47.99	-48	-46.98	-47.86	-46.44
10	-45.56	-46.78	-46.45	-47.67	-45.59	-47.53	-45	-45.92	-46.75	-47.11	-46.02	-46.04
11	-47.29	-48.53	-47.84	-48.12	-47.18	-46.5	-47.22	-48.68	-47.15	-48.06	-47.77	-47.5
12	-44.89	-44.37	-44.07	-44.76	-45.98	-45.53	-44.63	-45.5	-45.77	-41.76	-43.66	-45.35
13	-52.43	-52.22	-50.76	-50.63	-51.37	-48.66	-52.36	-52.81	-51.74	-52.27	-51.28	-50.74
14	-43.11	-44.12	-43.08	-45.08	-42.97	-43.8	-45.44	-45.53	-44.2	-45.55	-44.43	-45.08
15	-50.08	-50.44	-50.47	-51.1	-51.02	-51.09	-51.18	-49.73	-51.19	-49.55	-50.47	-52.22
16	-46.46	-45.64	-46.27	-46.96	-44.68	-45.84	-46.07	-45.89	-47.39	-47.81	-46.53	-46.04
17	-51.38	-52.04	-52.75	-51.48	-55.61	-52.68	-52.94	-51.38	-52.1	-52.27	-51.84	-51.74
18	-52.14	-51.64	-51.88	-50.76	-51.46	-52.22	-51.94	-51.17	-50.99	-51.31	-51.54	-51.63
19	-48.35	-50.67	-48.59	-49.04	-50.33	-50.23	-50.05	-51.04	-50.67	-50.53	-50.66	-50.1
20	-47.26	-47.12	-48.33	-46.8	-46.22	-47.91	-47.95	-47.16	-47.76	-47.57	-48.21	-47.52
21	-51.79	-52.77	-51.45	-52.96	-53.88	-52.66	-54.47	-53.37	-53.42	-53.89	-54.95	-53.22
22	-44.17	-46.1	-45.46	-45.45	-43.9	-46.47	-45.29	-46.38	-45.63	-46.95	-45.52	-46.72
23	-45.94	-44.89	-45.76	-46.24	-46.47	-46.88	-45.93	-47.05	-44.53	-45.37	-45.79	-45.94
24	-47.87	-47.3	-47.61	-47.04	-47.98	-47.76	-47.72	-46.72	-46.55	-47.71	-47.93	-47.48
25	-48.46	-47.86	-48.41	-46.43	-49.19	-47.82	-47.28	-48.4	-48.62	-47.78	-47.43	-46.9
26	-50.78	-51.31	-51.37	-49.88	-51.18	-51.99	-51.33	-49.45	-52.33	-51.05	-50.99	-50.66
27	-47.14	-46.14	-45.68	-46.25	-45.06	-43.92	-44.3	-46.7	-45.57	-45.82	-46.19	-46.5
28	-49.17	-47.03	-48.62	-48.17	-47.58	-49	-48.82	-48.02	-46.72	-48.78	-48.9	-48.72
29	-42.77	-43.79	-42.79	-41.85	-41.39	-41.51	-43.38	-43.57	-42.43	-42.4	-42.66	-42.55
30	-43.68	-43.37	-44.37	-43.19	-43.43	-44.21	-44.09	-45.6	-43.25	-44.94	-43.96	-40.44
31	-41.93	-42.79	-40.96	-43.82	-42.49	-42.3	-41.28	-42.68	-43.01	-42.9	-42.55	-42.56
32	-47.62	-48.68	-47.54	-47.33	-46.2	-50.82	-47.32	-48.37	-46.03	-50.36	-48.08	-46.27

## Sheet: theta
编号	A1B1C3	A2B1C3	A1B2C3	A2B2C3	A1B1C2	A2B1C2	A1B2C2	A2B2C2	A1B1C1	A2B1C1	A1B2C1	A2B2C1
1	-47.35	-46.11	-48.15	-47.41	-46.6	-48.49	-46.86	-51.08	-43.16	-45.64	-44.02	-47.74
2	-46.05	-46.98	-45.5	-45.35	-48.45	-49.28	-49.79	-51.58	-50.28	-46.2	-48.96	-50.93
3	-42.18	-42.56	-39.78	-43.25	-41.3	-42.84	-44.97	-41.73	-43.56	-42.26	-44.88	-45.76
4	-52.35	-51.96	-50.93	-51.02	-52.05	-51.38	-52.1	-50.78	-51.48	-50.07	-51.07	-51.11
5	-44.78	-45.52	-45.47	-44.46	-45.25	-45.03	-46.42	-44.79	-45.4	-46.93	-45.85	-45.31
6	-45.58	-42.34	-44.17	-43.36	-45.17	-46.09	-41.25	-44.88	-46.88	-43.56	-46.32	-46.28
7	-48.26	-47.18	-47.56	-50.07	-48.68	-51.06	-47.44	-46.77	-48.02	-49.36	-47.11	-47.99
8	-46.44	-46	-47.18	-43.61	-45.38	-44.7	-46.82	-47.35	-47.92	-48.21	-47.38	-46.65
9	-45.31	-44.78	-43.5	-44.47	-46.5	-44.41	-46.68	-43.12	-44.86	-44.8	-41.73	-43.5
10	-47.01	-46.85	-48.96	-46.94	-48.31	-48.88	-47.12	-45.44	-49.22	-45.62	-47.52	-47.31
11	-44.08	-46.73	-47	-43.87	-46.77	-46.82	-46.01	-47.31	-46.23	-45.94	-46.42	-48.34
12	-42.34	-39.97	-38.34	-40.26	-41.55	-43.16	-42.84	-42.67	-37.54	-38.6	-36.46	-37.65
13	-43.46	-43.71	-44.46	-45.54	-43.66	-44.13	-43.8	-45.22	-42.89	-41.97	-40.37	-44.43
14	-47.03	-48.71	-48.62	-47.57	-47.84	-47.45	-49.02	-46.43	-48.43	-47.79	-46.18	-46.8
15	-49.71	-48.96	-46.95	-51.17	-48.35	-50.18	-48.95	-50.05	-49.23	-49.49	-49.04	-50.6
16	-45.38	-43.06	-47.95	-47.51	-52.24	-48.94	-48.2	-45.69	-43.47	-47.08	-44.72	-47.87
17	-54.63	-55.31	-54.94	-55.81	-55.99	-54.86	-53.95	-52.72	-53.66	-56.49	-55.37	-53.55
18	-52.86	-54.14	-51.61	-52.77	-54.4	-54.08	-53.9	-52.53	-55.06	-52.86	-51	-53.76
19	-42.95	-42.73	-43.09	-42.41	-44.13	-44.45	-43.57	-44.73	-41.2	-43.65	-44.29	-45.25
20	-40.32	-40.27	-43.52	-43.19	-44.6	-44.61	-43.27	-41.38	-41.34	-45.03	-40.36	-43.45
21	-43.28	-42.17	-42.51	-42.14	-40.75	-41.47	-41.67	-44.71	-43.83	-43.24	-44.24	-40.66
22	-48.77	-48.25	-48.27	-46.85	-44.77	-45.9	-45.7	-43.24	-44.8	-42.03	-46.38	-45.69
23	-52.37	-53.83	-54.5	-52.57	-52.34	-54.23	-50.3	-52.34	-53.65	-51.87	-53.76	-54.02
24	-41.97	-44.19	-45.59	-44.14	-44.45	-42.94	-40.53	-41.82	-43.32	-45.97	-42.77	-42.46
25	-46.01	-48.26	-48.23	-46.67	-44.47	-47.03	-47.46	-46.39	-45.18	-47.96	-45.06	-49.86
26	-42.86	-40.34	-38.76	-40.85	-43.63	-43.54	-40.09	-41.52	-41.86	-42.41	-42.55	-41.65
27	-39.09	-39.06	-38.5	-38.44	-38.78	-39.61	-41.01	-37.1	-38.04	-39.82	-41.08	-39.45
28	-43.46	-42.83	-42.37	-42.92	-42.07	-41.35	-40.18	-42.64	-39.37	-42.75	-42.41	-43.72
29	-45.96	-42.52	-47.75	-47.73	-49.59	-51.59	-49.91	-44.01	-47.79	-42.78	-49.95	-42.62
30	-55.6	-54.3	-56.96	-53.75	-56.35	-54.46	-54.08	-52.55	-55.37	-54.76	-54.5	-54.4
31	-47.48	-46.38	-48.81	-47.1	-48.87	-48.32	-46.82	-45.74	-48.09	-46.75	-47.47	-47.37
32	-46.91	-43.89	-44.49	-46.37	-43.37	-50.22	-42.46	-50.86	-44.45	-47.71	-46.01	-48.75

## Sheet: gamma
编号	A1B1C3	A2B1C3	A1B2C3	A2B2C3	A1B1C2	A2B1C2	A1B2C2	A2B2C2	A1B1C1	A2B1C1	A1B2C1	A2B2C1
1	-38.82	-41.02	-42.57	-41.69	-38.28	-41.2	-39.97	-42.86	-38.14	-38.81	-37.11	-40.37
2	-41.47	-38.22	-40.07	-40.27	-45.64	-41.31	-46.51	-42.57	-43.74	-41.91	-45.72	-43.15
3	-36.39	-36.71	-37.47	-37.91	-35.88	-37.13	-39.58	-36.01	-38.49	-38.28	-39.84	-41.1
4	-48.02	-46.34	-45.47	-44.83	-42.96	-49.19	-43.15	-43.32	-44.75	-45.37	-44.68	-45.15
5	-44.13	-44	-43.07	-43.18	-40.07	-39.95	-43.57	-40.28	-39.93	-44.78	-40.46	-40.42
6	-40.65	-39.42	-38.78	-36.41	-37.4	-38.9	-37.08	-36.02	-40.56	-39.08	-39.36	-36.37
7	-43.49	-44.67	-46.56	-47.08	-48.11	-46.49	-44.25	-47.76	-45.74	-44.17	-47.12	-44.48
8	-51.13	-52.17	-50.93	-50.7	-48.25	-47.64	-50.01	-55.96	-54.04	-51.19	-52.32	-49.19
9	-42.02	-42.95	-43.04	-41.11	-44.93	-41.35	-45.36	-44.72	-46.81	-42.93	-47.19	-40.6
10	-37.69	-37.98	-38	-39.66	-39.25	-37.74	-37.87	-36.14	-37.13	-34.18	-39.19	-39.02
11	-43.74	-44.66	-44.35	-45.82	-46.38	-46.11	-44.63	-46.04	-46.4	-46.35	-45.87	-47.15
12	-50.47	-50.65	-45.24	-49.71	-49.07	-47.25	-45.2	-48.31	-50.21	-48.59	-49.75	-50.88
13	-38.63	-37.13	-37.67	-35.42	-37.25	-35.12	-37.12	-35.76	-35.86	-35.51	-38.76	-34.76
14	-43.54	-41.24	-40.65	-39.16	-39.65	-41.04	-41.45	-39.71	-40.29	-41.89	-41.53	-43.35
15	-50.36	-53.42	-53.12	-53.77	-53.53	-52.45	-51.56	-52.42	-52.53	-53.48	-53.01	-53.17
16	-42.62	-39.99	-38.57	-39.67	-38.41	-42.83	-41.48	-40.27	-39.63	-38.99	-39.15	-39.68
17	-43.02	-42.36	-41.54	-39.72	-36.42	-41.75	-40.22	-40.2	-40.99	-42.15	-40.29	-41.24
18	-65.53	-63.61	-60.61	-63.7	-63.78	-59.51	-63.94	-60.2	-60.78	-60.15	-61.38	-61.56
19	-41.14	-37.35	-36.75	-39.48	-41.45	-40.67	-40.34	-40.65	-38.43	-39.63	-40.4	-39.73
20	-41.79	-40.27	-41.48	-42.2	-41.39	-36.93	-40.12	-38.44	-38.82	-38.95	-40.96	-41.71
21	-52.44	-49.62	-51.01	-52.31	-52.6	-51.81	-51.84	-50.22	-51.07	-53.97	-54.02	-56.71
22	-38.16	-39.05	-38.03	-39.21	-39.19	-35.91	-36	-36.01	-37.67	-39.83	-39.53	-37.91
23	-43.79	-44.74	-44.55	-45.15	-39.86	-42.08	-41.91	-42.43	-39.99	-40.9	-43.56	-46.77
24	-33.04	-31.32	-35.19	-35.78	-39.17	-36.32	-37.02	-34.33	-33.42	-34.4	-32.94	-35.43
25	-34.75	-37.35	-35.1	-36.8	-38.83	-37.68	-39.47	-36.93	-39.85	-35	-37.34	-38.68
26	-38.63	-39.67	-37.92	-35.72	-37.83	-36.63	-34.09	-35.02	-34.47	-35.79	-38.92	-36.17
27	-32.79	-68.33	-34.79	-60.15	-37.28	-59.04	-34.43	-59.08	-36.37	-62.44	-33.61	-67.01
28	-39.77	-35.99	-40.82	-32.27	-38.6	-33.78	-42.55	-30.33	-40.96	-30.41	-39.05	-34.47
29	-40.52	-44.26	-43.01	-36.8	-41.42	-39.28	-41.31	-39.86	-40.7	-41.49	-41.08	-43.8
30	-51.68	-52.1	-52.33	-54.57	-54.5	-51.49	-54.96	-49.02	-53.4	-52.6	-53.86	-52.32
31	-35.57	-49.85	-35.85	-45.46	-32.89	-45.48	-34.36	-46.12	-33.46	-49.71	-34.52	-47.01
32	-66.95	-62.16	-64.37	-59.98	-64.22	-59.27	-63.48	-60.71	-64.82	-56.15	-63.45	-59.53
